# Supplementary material
Source: HighWire-hosted journal article supplement (https://www.cmajopen.ca/highwire/filestream/81123/field_highwire_adjunct_files/0/2016-0127-1-at.pdf)
Supplement: 2016-0127-1-at.pdf [file 2016-0127-1-at.pdf]

## Appendix 1 (as supplied by the authors): Description of datasets used for analysis

| Name of Dataset                                                    | Description of Dataset                                                                                                                                                                                                                                                                                                               | Years of Data Used                                               | Information retrieved                                                                  |
|--------------------------------------------------------------------|--------------------------------------------------------------------------------------------------------------------------------------------------------------------------------------------------------------------------------------------------------------------------------------------------------------------------------------|------------------------------------------------------------------|----------------------------------------------------------------------------------------|
| <b>Population Registry</b>                                         | A registry maintained by Manitoba Health of all Manitobans eligible to receive health services since 1970 and includes demographic information and 6-digit residential postal code.                                                                                                                                                  | 1970/71 to June 2013                                             | Demographic information: region of residence                                           |
| <b>Canada Census Information</b>                                   | Social data based on the Statistics Canada Population Census. These data were used to determine area-level income, with Manitoba population divided into income quintiles according to average-level household income, composed of five possible income groupings with Q1 being the lowest and Q5 being the highest income quintile. | 1996, 2001, 2006, 2013                                           | Socioeconomic status information                                                       |
| <b>Employment and Income Assistance Data</b>                       | Data maintained by Department of Families that provide information on Manitoba residences who receive provincial employment and income Assistance.                                                                                                                                                                                   | 1995/96 to 2012/2013                                             | Receipt of income assistance                                                           |
| <b>Babies First/Families First Screening Program data</b>          | Newborn risk screen data collected as part of a home visiting program conducted by Healthy Child Manitoba. The screen is filled out by Public Health Nurses on all families with newborns in Manitoba and captures data on biological, social and demographic risk factors and alcohol use during pregnancy.                         | 2003 to 2013<br>= Families First<br>2000 to 2002<br>= Baby First | Alcohol and drug use during pregnancy<br>Social isolation                              |
| <b>Insight Program data</b>                                        | Includes data from an outreach program where mentors provide intensive support to women who are pregnant or have recently had a baby and use substances. This dataset includes information on women who have prenatal alcohol use                                                                                                    | 1999 to 2012/2013                                                | Alcohol and substance use during pregnancy                                             |
| <b>Hospital Abstracts</b>                                          | Health data maintained by Manitoba Health consisting of all hospitalizations in Manitoba, including up to 16 ICD-9-CM diagnostic codes for discharges before April 1, 2004 and up to 25 ICD-10-CM diagnostic codes for discharges on or after April 1, 2004.                                                                         | 1984 to 2012/13                                                  | Physical and mental health diagnoses<br>Antenatal hospitalizations<br>Suicide attempts |
| <b>Medical/Physician reimbursement claims</b>                      | Health data maintained by Manitoba Health consisting of all ambulatory physician visits in Manitoba and include a single ICD-9 diagnostic code associated with each visit, coded to the third digit.                                                                                                                                 | 1984 to 2012/13                                                  | Physical and mental health diagnoses<br>Physician visits<br>Prenatal care              |
| <b>Prescription claims data: Drug Programs Information Network</b> | Data maintained by Manitoba Health containing all prescription drug claims from the Drug Programs Information Network (DPIN, an electronic, on-line, point-of-sale prescription drug database that connects Manitoba Health and all pharmacies in Manitoba). Contains information on all prescription drugs dispensed in Manitoba.   | 1995/96 to 2012/13                                               | Physical and mental health conditions                                                  |
| <b>Manitoba FASD Centre data</b>                                   | Includes clinical assessments and diagnoses received under the FASD umbrella for all children referred to the MB FASD Centre                                                                                                                                                                                                         | 1999 to 2012/2013                                                | FASD diagnosis<br>Children diagnosed with FASD                                         |
| <b>Vital Statistics data</b>                                       | A longitudinal population-based registry maintained by Manitoba's Vital Statistics Agency that includes all Manitobans who have died since January 1970 to present and the cause of death.                                                                                                                                           | 1970 to 2012/2013                                                | Cause of premature death<br>Suicide completion                                         |
| <b>Education data: Enrolment, Marks and Assessments</b>            | Education data maintained by the Department of Education and Training that provides information on enrolment, marks, and high school completion, and special funding. Special education funding is provided to children with severe to profound disabilities.                                                                        | 1995/96 to 2012/2013                                             | High school completion, level of special education funding                             |
| <b>Child and Family Services Information System (CFSIS)</b>        | A data management system that supports case tracking and reporting of services provided to children and families as they pass through the Manitoba Child and Family services (CFS) System. This database includes information on children in care as well as information of families receiving protective and support services.      | 1992/1993 to 2012/2013                                           | Involvement with child and family services                                             |
